# Supplementary material for: Four Keggin-type polyoxometalate-based complexes derived from bis(pyrazine)–bis(amide) ligands for electrochemical sensing of multiple analytes and adsorbing dye molecules
Source: Royal Society of Chemistry journal article supplement (doi:10.1039/d1ce01403j), 2022-01-01
Supplement: d1ce01403j1.pdf [file d1ce01403j1.pdf]

**Supplementary Material (ESI) for *CrystEngComm***

**This journal is © The Royal Society of Chemistry**

**Four Keggin-type polyoxometalate-based complexes derived from bis(pyrazine)-bis(amide) ligands for sensing multiple analytes and adsorbing dye molecules**

**Zi-Wei Cui <sup>a,b</sup>, Jun-Jun Lu <sup>a</sup>, Hong-Yan Lin <sup>a</sup>, Jian Luan <sup>c</sup>, Zhi-Han Chang <sup>a</sup>, Xiao-Hui Li <sup>a,\*</sup>, Xiu-Li Wang <sup>a,\*</sup>**

**X-ray Crystallographic Study**

Single crystal X-ray diffraction analysis data for **1-4** were carried out using a Bruker SMART APEX II CCD diffractometer equipped with Mo-K $\alpha$  monochromatic radiation ( $\lambda = 0.71073$  Å) by  $\omega$  and  $\theta$  scan mode. All the structures were solved by direct methods with the Olex2 software. <sup>1</sup> The final refinement was performed by full matrix least-squares techniques on F<sup>2</sup>. All Hydrogen atoms were placed in geometrically idealized position as a riding mode. In **1**, the instruction “ISOR” was used to refine atoms O3, O16, O17, O18, O22, O23, O24, O4W and O7W. In **2**, the instruction “ISOR” was used to refine atoms O2W, O12, C12, N4, C14 and O4. In **3**, the instruction “ISOR” was used to refine atoms O9, O11, O2W and O3W. The instruction “RIGU” was used to refine atoms O1, C9, N4, O19, C5, C6, N3, C8 and C2. The instruction “DFIX” was used to refine the distance of Si1 and O14. In **4**, the instruction “ISOR” was used to refine atoms O15, O15A, O18A, O18, O5, O12, O16, O10A, O21 and O10. Data collection, cell refinement and data reduction for complexes **1-4** were performed in Table 1. Selected bond distances and angles were summarized in Table S1. The CCDC numbers are 1998300-1998301, 2061293-2061294.

**Preparation of complexes 1-4 bulk-modified carbon paste electrode (1-, 2-, 3-, 4-CPEs)**

Complexes **1-4** modified carbon paste electrodes (**1-, 2-, 3-, 4-CPEs**) was prepared as follows: graphite powder (0.10 g) and complexes **1-4** (0.01 g) were mixed and ground together in an agate mortar for approximately 45 minutes to get a homogeneous mixture, and then 0.05mL paraffin oil was added and the mixture was stirred with a glass rod. The uniform mixture was packed into a 3 mm inner diameter glass tube and the tube

surface was wiped with weighing paper. The electrical contact was established with copper wire through the back of the electrode.

**Table S1.** Selected bond distances (Å) and angles (°) for complexes **1-4**

| Complex 1                                        |          |                     |           |
|--------------------------------------------------|----------|---------------------|-----------|
| Cu(1)-O(1)                                       | 1.958(6) | Cu(2)-O(1W)         | 2.454(11) |
| Cu(1)-O(1)#2                                     | 1.958(6) | Cu(2)-O(2)#3        | 1.968(7)  |
| Cu(1)-O(4)#2                                     | 2.367(6) | Cu(2)-O(2)          | 1.968(7)  |
| Cu(1)-O(4)                                       | 2.367(6) | Cu(2)-N(2)          | 1.966(10) |
| Cu(1)-N(1)#2                                     | 1.971(7) | Cu(2)-N(2)#3        | 1.966(10) |
| Cu(1)-N(1)                                       | 1.971(7) | Cu(2)-O(1W)#3       | 2.454(11) |
| O(1)#2-Cu(1)-O(1)                                | 180      | N(1)#2-Cu(1)-O(4)   | 89.7(3)   |
| O(1)-Cu(1)-O(4)                                  | 94.0(3)  | N(1)-Cu(1)-N(1)#2   | 180       |
| O(1)-Cu(1)-O(4)#2                                | 86.0(3)  | O(2)-Cu(2)-O(1W)    | 86.8(4)   |
| O(1)#2-Cu(1)-O(4)#2                              | 94.0(3)  | O(2)#3-Cu(2)-O(1W)  | 93.2(4)   |
| O(1)#2-Cu(1)-O(4)                                | 86.0(3)  | O(2)#3-Cu(2)-O(2)   | 180       |
| O(1)#2-Cu(1)-N(1)                                | 97.7(3)  | N(2)#3-Cu(2)-O(1W)  | 88.4(4)   |
| O(1)#2-Cu(1)-N(1)#2                              | 82.3(3)  | N(2)-Cu(2)-O(1W)    | 91.6(4)   |
| O(1)-Cu(1)-N(1)#2                                | 97.7(3)  | N(2)#3-Cu(2)-O(2)#3 | 82.5(3)   |
| O(1)-Cu(1)-N(1)                                  | 82.3(3)  | N(2)-Cu(2)-O(2)#3   | 97.5(3)   |
| O(4)#2-Cu(1)-O(4)                                | 180      | N(2)-Cu(2)-O(2)     | 82.5(3)   |
| N(1)-Cu(1)-O(4)#2                                | 89.7(3)  | N(2)#3-Cu(2)-O(2)   | 97.5(3)   |
| N(1)#2-Cu(1)-O(4)#2                              | 90.3(3)  | N(2)-Cu(2)-N(2)#3   | 180       |
| N(1)-Cu(1)-O(4)                                  | 90.3(3)  |                     |           |
| Symmetry codes: #2 -x,-y+1,-z+1; #3 -x,-y+2,-z+2 |          |                     |           |

| Complex 2                                                |           |                     |           |
|----------------------------------------------------------|-----------|---------------------|-----------|
| Cu(1)-O(1)#1                                             | 1.935(9)  | Cu(2)-O(2)          | 1.934(9)  |
| Cu(1)-O(3)                                               | 1.941(9)  | Cu(2)-O(4)#2        | 1.949(9)  |
| Cu(1)-O(6)                                               | 2.548(10) | Cu(2)-O(7)          | 2.457(9)  |
| Cu(1)-N(1)#1                                             | 2.003(11) | Cu(2)-N(2)          | 1.977(12) |
| Cu(1)-N(11)                                              | 1.979(11) | Cu(2)-N(6)#2        | 1.992(12) |
| Cu(1)-O(5)                                               | 2.463(10) | O(2)-Cu(2)-O(7)     | 81.6(3)   |
| O(1)#1-Cu(1)-O(6)                                        | 82.3(4)   | O(2)-Cu(2)-N(2)     | 83.0(4)   |
| O(1)#1-Cu(1)-N(1)#1                                      | 83.4(4)   | O(2)-Cu(2)-N(6)#2   | 97.4(4)   |
| O(1)#1-Cu(1)-N(11)                                       | 97.6(4)   | O(4)#2-Cu(2)-O(7)   | 106.8(4)  |
| O(3)-Cu(1)-O(6)                                          | 95.8(4)   | O(4)#2-Cu(2)-N(2)   | 95.3(4)   |
| O(3)-Cu(1)-N(1)#1                                        | 97.0(4)   | O(4)#2-Cu(2)-N(6)#2 | 82.7(4)   |
| O(3)-Cu(1)-N(11)                                         | 82.4(4)   | N(2)-Cu(2)-O(7)     | 101.9(4)  |
| N(1)#1-Cu(1)-O(6)                                        | 110.1(4)  | N(2)-Cu(2)-N(6)#2   | 168.9(5)  |
| N(11)-Cu(1)-O(6)                                         | 82.2(4)   | N(6)#2-Cu(2)-O(7)   | 89.1(4)   |
| N(11)-Cu(1)-N(1)#1                                       | 167.6(4)  | O(2)-Cu(2)-O(4)#2   | 171.6(4)  |
| O(1)#1-Cu(1)-O(3)                                        | 178.1(4)  |                     |           |
| Symmetry codes: #1 x, -y+3/2, z+1/2; #2 x, -y+1/2, z-1/2 |           |                     |           |
| Complex 3                                                |           |                     |           |
| Co(1)-O(1W)#2                                            | 2.059(13) | Co(1)-N(1)          | 2.131(11) |
| Co(1)-O(1W)                                              | 2.059(13) | Co(1)-O(1)          | 1.95(3)   |
| Co(1)-N(1)#2                                             | 2.131(11) | Co(1)-O(1)#2        | 1.95(3)   |
| O(1W)#2-Co(1)-O(1W)                                      | 86.5(9)   | N(1)#2-Co(1)-N(1)   | 179.0(6)  |
| O(1W)#2-Co(1)-N(1)#2                                     | 88.0(4)   | O(1)-Co(1)-O(1W)    | 102.0(11) |
| O(1W)-Co(1)-N(1)                                         | 88.0(4)   | O(1)-Co(1)-O(1W)#2  | 170.3(11) |

|                                         |           |                     |           |
|-----------------------------------------|-----------|---------------------|-----------|
| O(1W)-Co(1)-N(1)#2                      | 92.7(4)   | O(1)-Co(1)-N(1)#2   | 96.4(8)   |
| O(1W)#2-Co(1)-N(1)                      | 92.7(4)   | O(1)-Co(1)-N(1)     | 82.8(8)   |
| Symmetry codes: #2 -x, y, -z+1          |           |                     |           |
| Complex 4                               |           |                     |           |
| Cu(1)-O(1)                              | 1.952(14) | Cu(1)-N(1)#2        | 1.962(18) |
| Cu(1)-O(2)#2                            | 1.948(14) | Cu(1)-N(2)          | 1.958(18) |
| Cu(1)-O(3)                              | 2.345(14) | O(2)#2-Cu(1)-N(1)#2 | 83.6(7)   |
| O(1)-Cu(1)-O(3)                         | 88.3(6)   | O(2)#2-Cu(1)-N(2)   | 96.8(7)   |
| O(1)-Cu(1)-N(1)#2                       | 96.3(7)   | N(1)#2-Cu(1)-O(3)   | 100.7(6)  |
| O(1)-Cu(1)-N(2)                         | 84.0(7)   | N(2)-Cu(1)-O(3)     | 87.8(7)   |
| O(2)#2-Cu(1)-O(1)                       | 175.6(6)  | N(2)-Cu(1)-N(1)#2   | 171.5(7)  |
| O(2)#2-Cu(1)-O(3)                       | 87.5(6)   |                     |           |
| Symmetry codes: #2 x-1/2, -y+3/2, z-1/2 |           |                     |           |

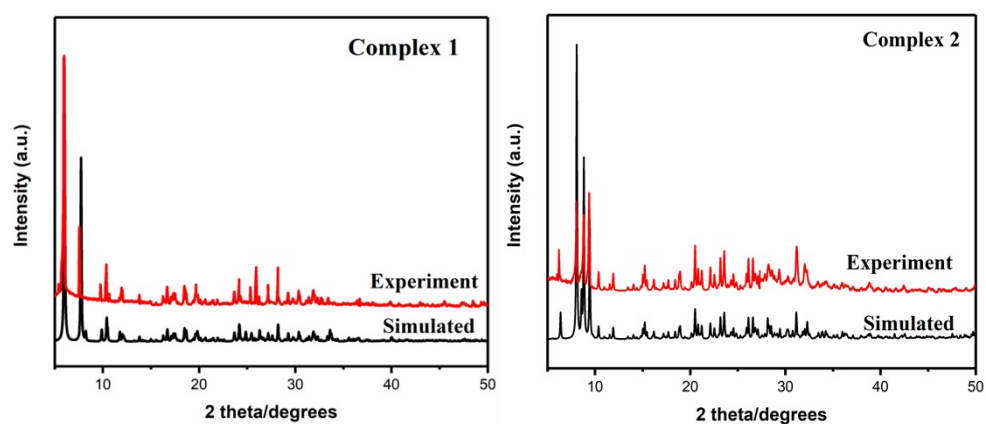

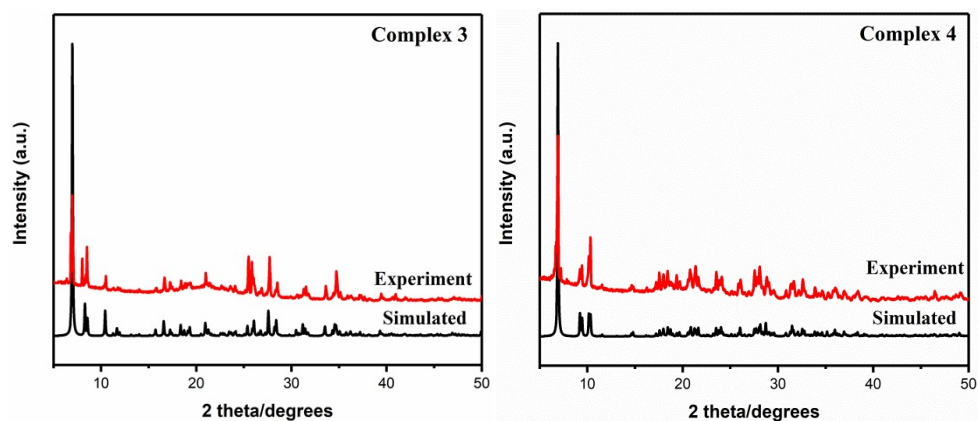

Fig. S1 The PXRD patterns of complexes 1-4.

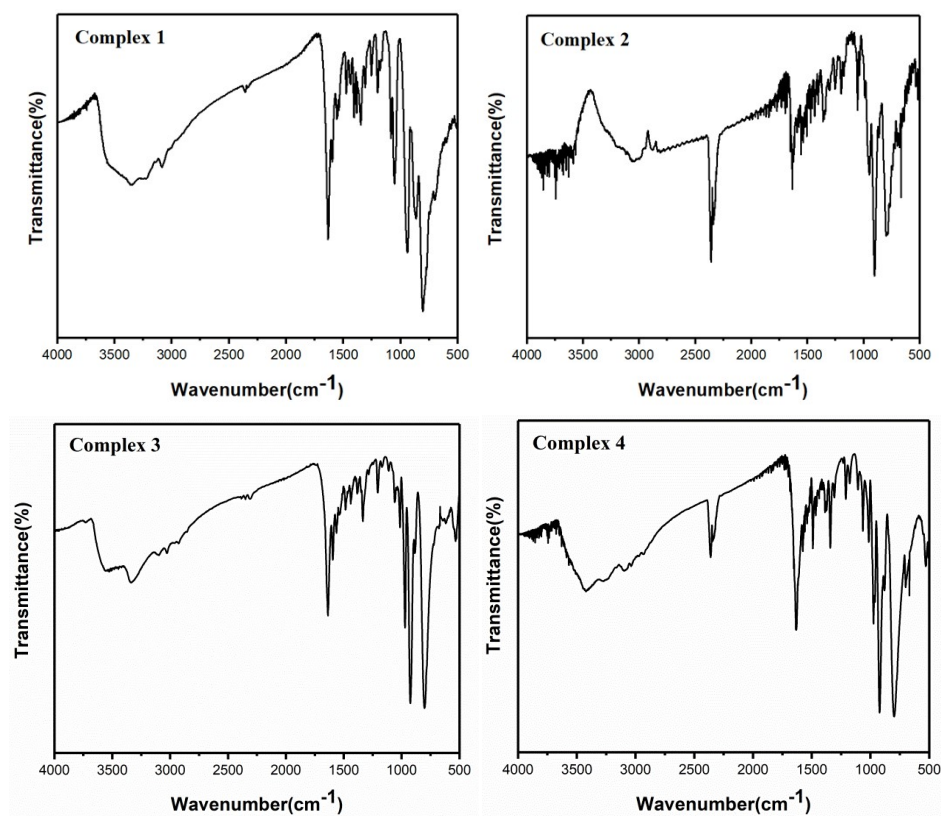

Fig. S2 The IR spectra of complexes 1-4.

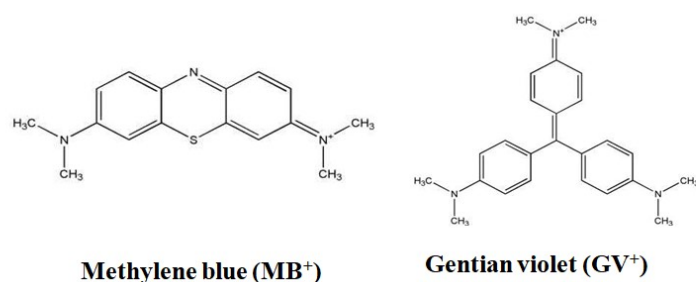

**Scheme S1** Chemical structures of MB and GV.

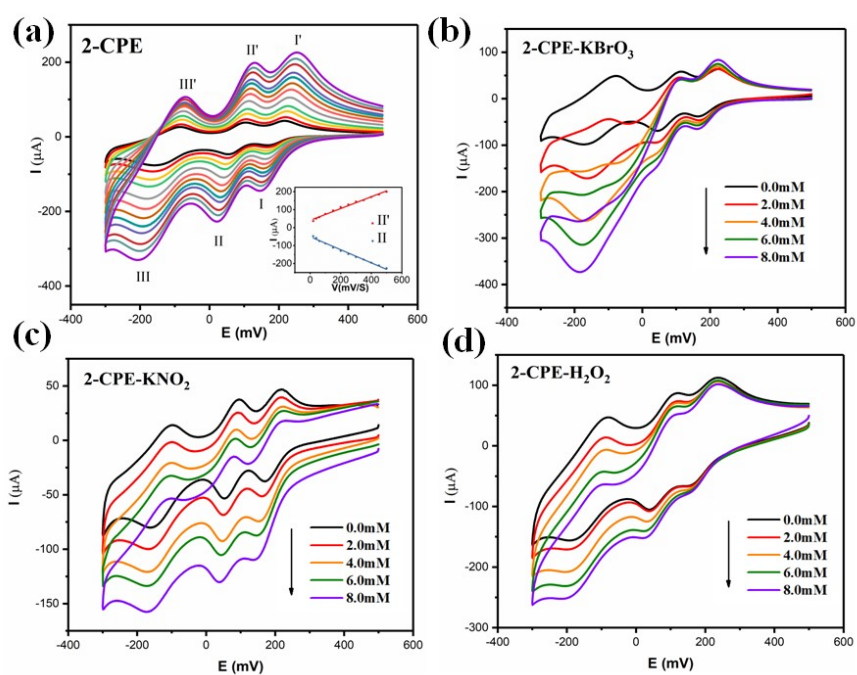

**Fig. S3** (a) Cyclic voltammograms of the 2-CPE in 0.1 M H<sub>2</sub>SO<sub>4</sub> + 0.5 M Na<sub>2</sub>SO<sub>4</sub> aqueous solution at different scan rates (from inner to outer: 20, 40, 60, 100, 150, 200, 250, 300, 350, 400, 450, 500 mV s<sup>-1</sup>); Inset: the plots of peak currents vs. scan rates. The cyclic voltammograms of 2-CPE in 0.1 M H<sub>2</sub>SO<sub>4</sub> + 0.5 M Na<sub>2</sub>SO<sub>4</sub> electrolyte solution including (b) KBrO<sub>3</sub>, (c) KNO<sub>2</sub> and (d) H<sub>2</sub>O<sub>2</sub> (scan rate: 60 mV s<sup>-1</sup>).

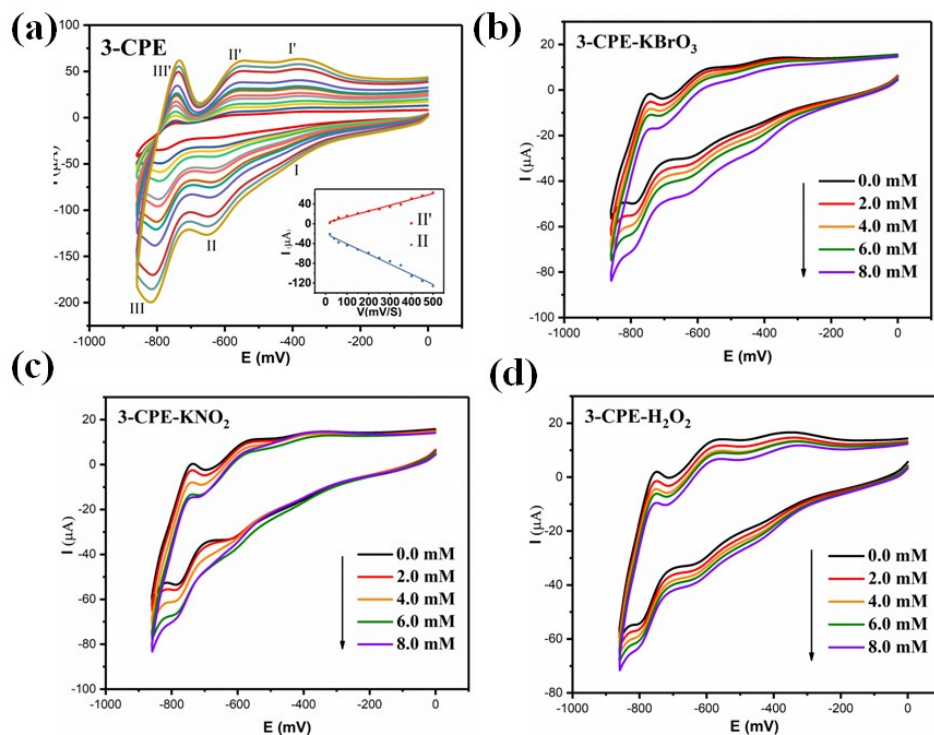

**Fig. S4** (a) Cyclic voltammograms of the 3-CPE in 0.1 M H<sub>2</sub>SO<sub>4</sub> + 0.5 M Na<sub>2</sub>SO<sub>4</sub> aqueous solution at different scan rates (from inner to outer: 20, 40, 60, 100, 150, 200, 250, 300, 350, 400, 450, 500 mV s<sup>-1</sup>); Inset: the plots of peak currents vs. scan rates. The cyclic voltammograms of 3-CPE in 0.1 M H<sub>2</sub>SO<sub>4</sub> + 0.5 M Na<sub>2</sub>SO<sub>4</sub> electrolyte solution including (b) KBrO<sub>3</sub>, (c) KNO<sub>2</sub> and (d) H<sub>2</sub>O<sub>2</sub> (scan rate: 60 mV s<sup>-1</sup>).

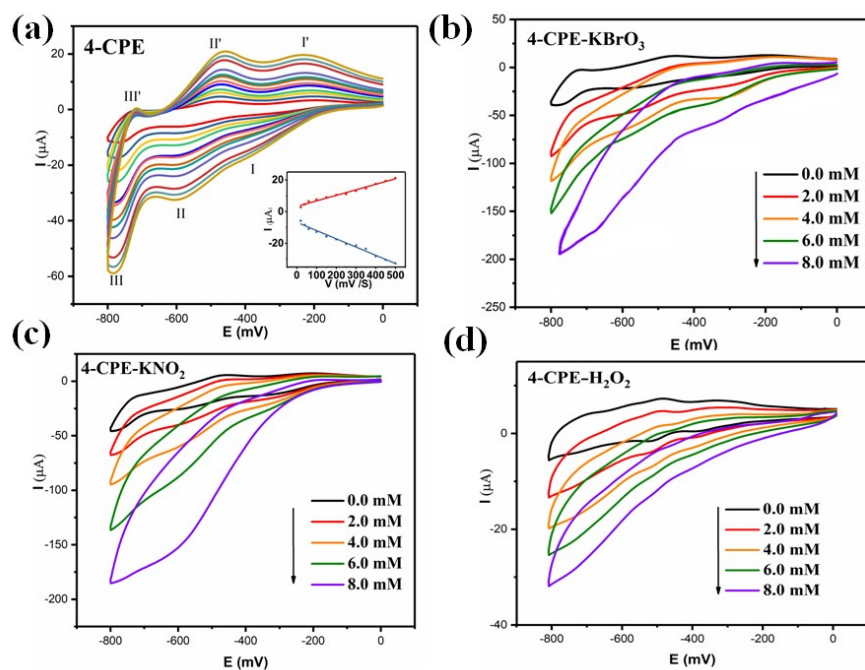

**Fig. S5** (a) Cyclic voltammograms of the 4-CPE in 0.1 M H<sub>2</sub>SO<sub>4</sub> + 0.5 M Na<sub>2</sub>SO<sub>4</sub> aqueous solution at different scan rates (from inner to outer: 20, 40, 60, 100, 150, 200, 250, 300, 350, 400, 450, 500 mV s<sup>-1</sup>); Inset: the plots of peak currents vs. scan rates. The cyclic voltammograms of 4-CPE in 0.1 M H<sub>2</sub>SO<sub>4</sub> + 0.5 M Na<sub>2</sub>SO<sub>4</sub> electrolyte solution including (b) KBrO<sub>3</sub>, (c) KNO<sub>2</sub> and (d) H<sub>2</sub>O<sub>2</sub> (scan rate: 60 mV s<sup>-1</sup> ).

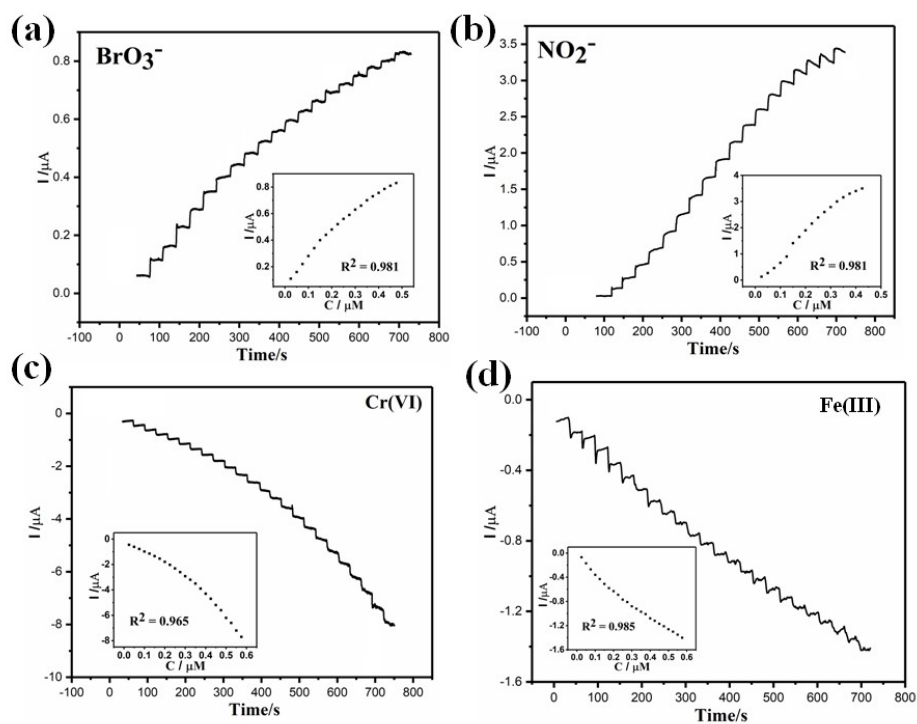

**Fig. S6** Amperometric response for the 2-CPE on successive addition of 0.1 mM BrO<sub>3</sub><sup>-</sup> (a), NO<sub>2</sub><sup>-</sup>(b), Cr(VI) (c) and Fe(III) (d) to 0.1 M H<sub>2</sub>SO<sub>4</sub> + 0.5 M Na<sub>2</sub>SO<sub>4</sub> aqueous solution per 30 s interval. The inset: the steady-state calibration curve for current versus nitrite concentration.



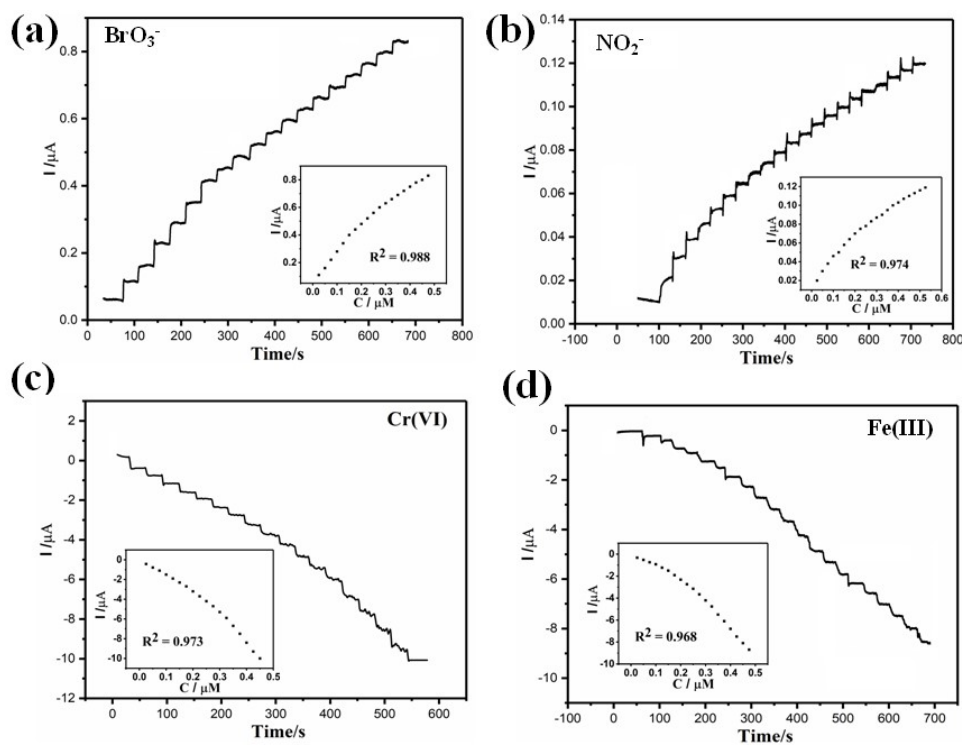

**Fig. S7** Amperometric response for the **3**-CPE on successive addition of 0.1 mM  $\text{BrO}_3^-$  (a),  $\text{NO}_2^-$  (b),  $\text{Cr(VI)}$  (c) and  $\text{Fe(III)}$  (d) to 0.1 M  $\text{H}_2\text{SO}_4$  + 0.5 M  $\text{Na}_2\text{SO}_4$  aqueous solution per 30 s interval. The inset: the steady-state calibration curve for current versus nitrite concentration.

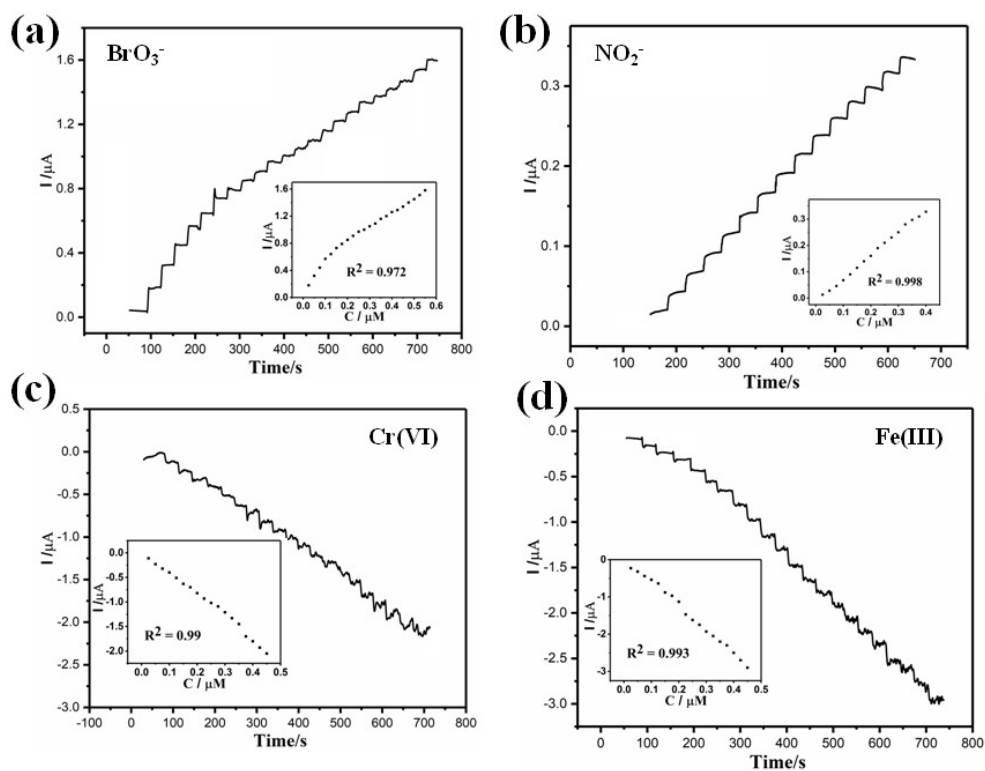

**Fig. S8** Amperometric response for the 4-CPE on successive addition of 0.1 mM  $\text{BrO}_3^-$  (a),  $\text{NO}_2^-$  (b),  $\text{Cr(VI)}$  (c) and  $\text{Fe(III)}$  (d) to 0.1 M  $\text{H}_2\text{SO}_4$  + 0.5 M  $\text{Na}_2\text{SO}_4$  aqueous solution per 30 s interval. The inset: the steady-state calibration curve for current versus nitrite concentration.

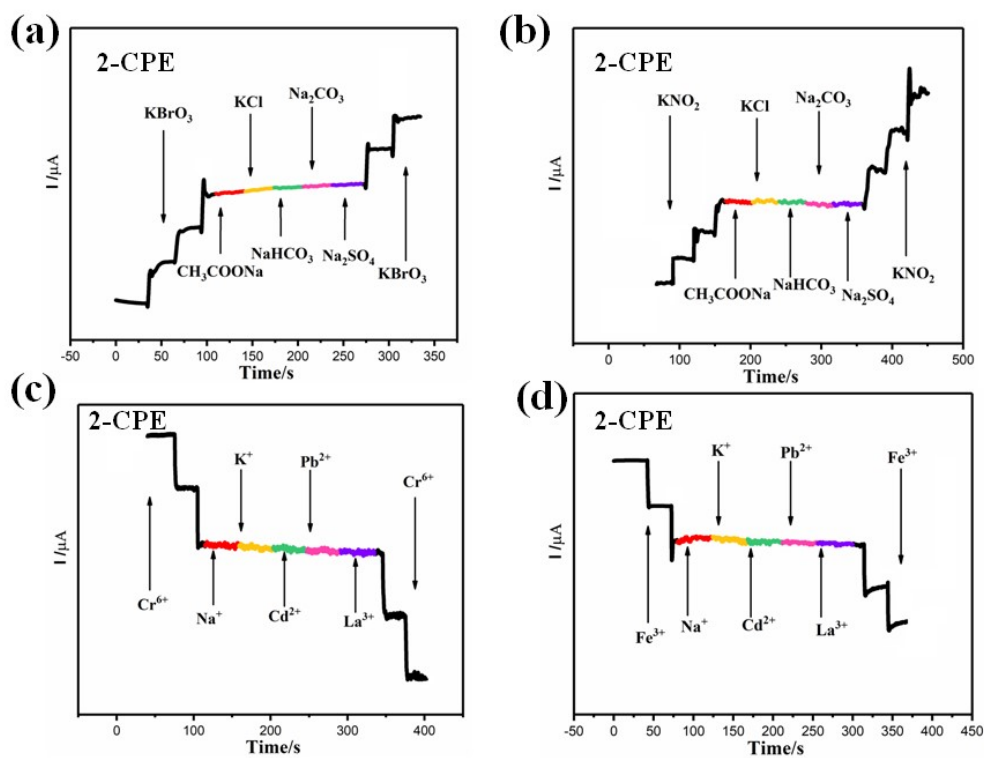

**Fig. S9** Current response of 2-CPE for  $\text{BrO}_3^-$  (a),  $\text{NO}_2^-$  (b),  $\text{Cr(VI)}$  (c) and  $\text{Fe(III)}$  (d) and other interfering ions in 0.1 M  $\text{H}_2\text{SO}_4$  + 0.5 M  $\text{Na}_2\text{SO}_4$  electrolyte.

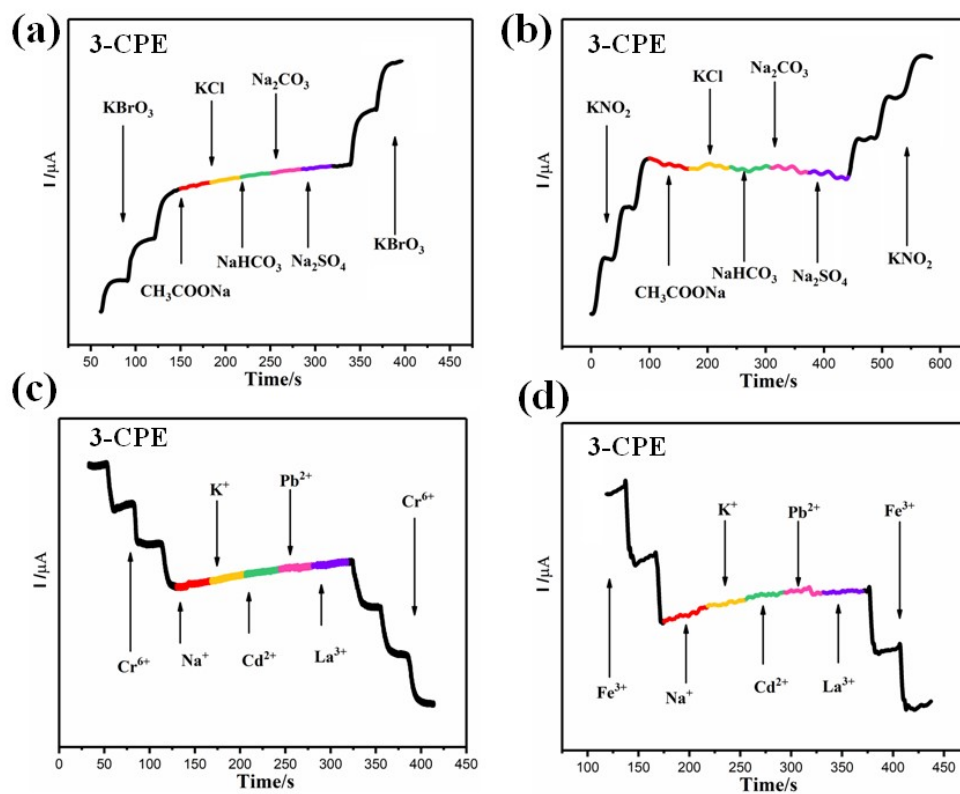

**Fig. S10** Current response of 3-CPE for  $\text{BrO}_3^-$  (a),  $\text{NO}_2^-$  (b),  $\text{Cr(VI)}$  (c) and  $\text{Fe(III)}$  (d) and other interfering ions in 0.1 M  $\text{H}_2\text{SO}_4$  + 0.5 M  $\text{Na}_2\text{SO}_4$  electrolyte.

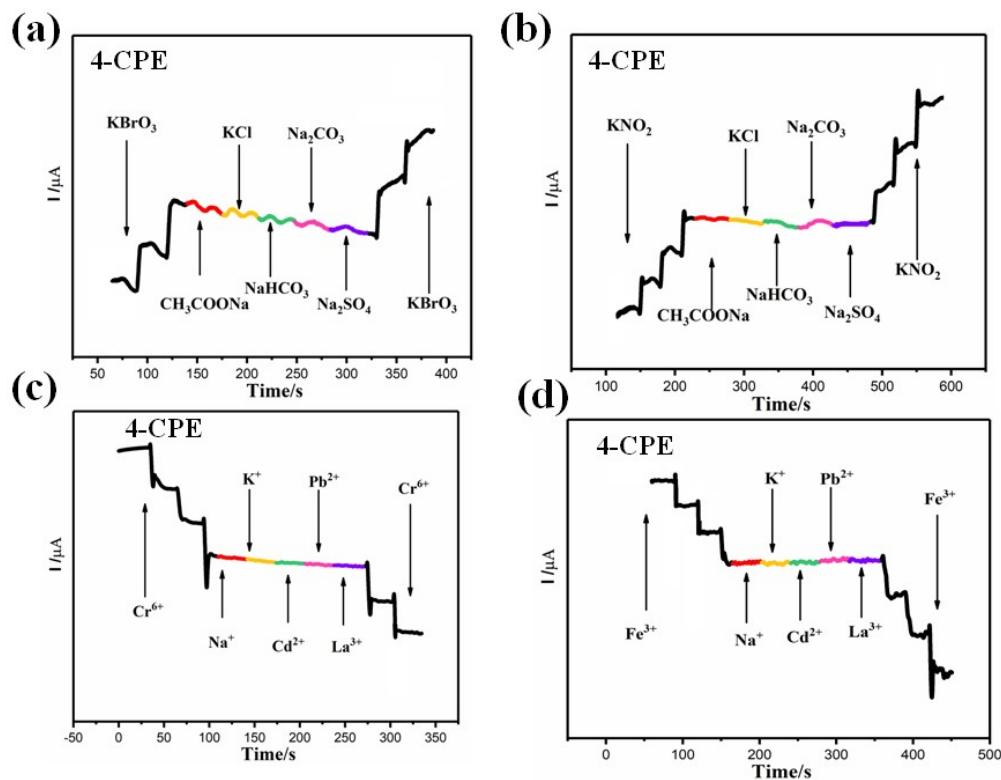

**Fig. S11** Current response of 4-CPE for  $\text{BrO}_3^-$  (a),  $\text{NO}_2^-$  (b),  $\text{Cr(VI)}$  (c) and  $\text{Fe(III)}$  (d) and other interfering ions in 0.1 M  $\text{H}_2\text{SO}_4$  + 0.5 M  $\text{Na}_2\text{SO}_4$  electrolyte.

## Notes and references

S1. O.V. Dolomanov, L. J. Bourhis, R. J. Gildea, J. A. K. Howard, H. Puschmann, *J. Appl. Cryst.*, 2009, **42**, 339.
